# Supplementary material
Source: publisher figshare collection journal article supplement (https://karger.figshare.com/articles/dataset/_/4542604)
Supplement: Supplementary file 1 [file 1]

Table S1. Cause-Specific Mortality Codes From the Centers for Medicare & Medicaid End-Stage Renal Disease Death Notification (Form CMS-2746)

| Cause of Death                  | Death Code <sup>*</sup> |                            |
|---------------------------------|-------------------------|----------------------------|
|                                 | Before September 2006   | Effective September 2006   |
| Cardiovascular disease          |                         |                            |
| Acute myocardial infarction     | 23                      | 23                         |
| Pericarditis                    | 25                      | 25                         |
| Atherosclerotic heart disease   | 26                      | 26                         |
| Cardiomyopathy                  | 27                      | 27                         |
| Cardiac arrhythmia              | 28                      | 28                         |
| Cardiac arrest, cause unknown   | 29                      | 29                         |
| Valvular heart disease          | 30                      | 30                         |
| Pulmonary edema                 | 31                      | 31                         |
| Congestive heart failure        | 32                      | 32                         |
| Cerebrovascular disease         | 36,37                   | 36,37                      |
| Infection                       |                         |                            |
| Septicemia                      | 49, 50, 51, 52          | 33, 34, 51, 52             |
| Pulmonary infection             | 53, 54, 55, 58          | 62                         |
| Viral infection                 | 56, 57, 64, 65          | 64, 65, 71                 |
| AIDS                            | 59                      | --                         |
| Other infection                 | 60, 74                  | 45, 46, 47, 48, 61, 63, 70 |
| Malignant disease               | 82, 83                  | 82, 83                     |
| Other                           |                         |                            |
| Hyperkalemia                    | 24                      | 24                         |
| Cachexia                        | 81                      | 81                         |
| Gastro-intestinal hemorrhage    | 72                      | 72                         |
| Other hemorrhage                | 38, 39, 40, 41, 42, 43  | 38, 39, 40, 41, 42, 43     |
| Seizures                        | 85                      | 85                         |
| Unknown cause                   | 99                      | 99                         |
| Withdrawal from dialysis/uremia | --                      | 104                        |
| Other cause                     | others                  | others                     |

<sup>\*</sup>Form CMS-2746 was updated as of September 2006, and some causes of death and codes were changed.
